# Supplementary material for: Comparative Analysis of Sleep Hygiene and Patterns among Adolescents in Two Russian Arctic Regions: A Pilot Study
Source: MDPI journal article supplement (doi:10.3390/children11030279), 2024-02-24
Supplement: s1 [file s1]

## Supplementary Files

**Table S1:** Specific sleep patterns reported by children

|                                                |    |            |            |            |                              |
|------------------------------------------------|----|------------|------------|------------|------------------------------|
| Awakenings at night, n (%)                     | 93 | 25 (26.6%) | 11 (28.9%) | 14 (25.5%) | p = 0.71;<br>$\chi^2 = 0.14$ |
| The need for noise isolation at night, n (%)   | 92 | 39 (41.5%) | 15 (39.5%) | 24 (44.4%) | p = 0.64;<br>$\chi^2 = 0.23$ |
| The need for complete darkness at night, n (%) | 93 | 34 (36.2%) | 13 (34.2%) | 21 (38.2%) | p = 0.15;<br>$\chi^2 = 0.70$ |
| Being afraid while sleeping, n (%)             | 93 | 28 (29.8%) | 12 (31.6%) | 16 (29.1%) | p = 0.07;<br>$\chi^2 = 0.80$ |
| Unusual behavior during sleep, n (%)           | 93 | 30 (31.9%) | 13 (38.2%) | 17 (30.9%) | p = 0.51;<br>$\chi^2 = 0.48$ |
| BP instability, n (%)                          | 93 | 8 (8.5%)   | 3 (7.9%)   | 5 (9.1%)   | p = 0.41;<br>$\chi^2 = 0.84$ |

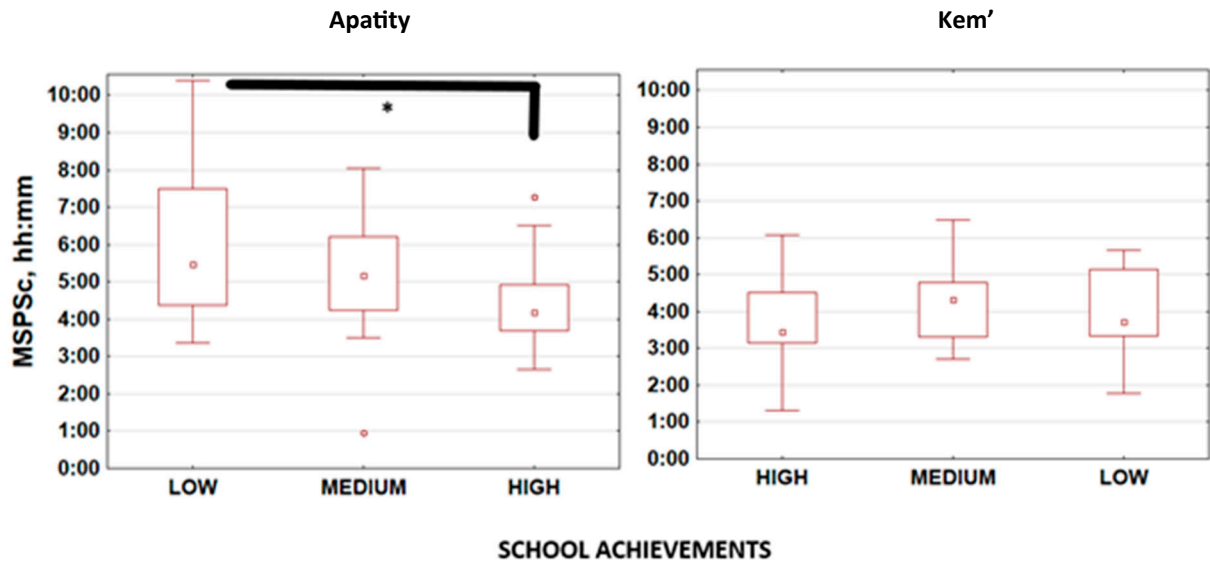

**Figure S1. Impact of chronotype on academic scores.** \* p < 0.05 Tukey's HSD post hoc correction. Y axis reflects chronotype values expressed in local time. X axis means academic scores categorized by 3 groups as follows: High – 5; 5>4; Low – 3; 3>4; Medium – other academic scores. Russian educational system has the following rank scale: 1-2 – bad; 3-4 low, 4 – good; 5-excellent.
